# Supplementary material for: Effects of sex hormones on brain GABA and glutamate levels in a cis- and transgender cohort
Source: bioRxiv or medRxiv preprint supplement (doi:10.1101/2021.10.20.21265242), 2021-10-26
Supplement: Supplementary file [file media-1.pdf]

## Supplement material

**Supplement table 1:** Treatment regimes in TM subjects

| treatment                                                       | number of subjects |
|-----------------------------------------------------------------|--------------------|
| Nebido 1000mg, every 8-12 weeks, i.m                            | 5                  |
| testosterone cream 50mg/d                                       | 4                  |
| Nebido 1000mg + Moniq Gynial 75µg/d (desogestrel gel)           | 2                  |
| Testavan 46mg/d (testosterone gel)                              | 1                  |
| testosterone cream 37.5mg/d + Moniq Gynial 75µg/d               | 1                  |
| testosterone cream 50mg/d + Moniq Gynial 75µg/d                 | 1                  |
| Nebido 1000mg + decapeptyl depot (triptorelin), every 4-5 weeks | 1                  |

**Supplement table 2:** Absolute number of data points (of max. 15) at each measurement included in linear mixed effect model analyses for each region and neurotransmitter ratio

|             |    | GABA+/tCr |    | Glx/tCr |    |
|-------------|----|-----------|----|---------|----|
|             |    | M1        | M2 | M1      | M2 |
| hippocampus | CW | 15        | 12 | 15      | 15 |
|             | TM | 13        | 13 | 13      | 14 |
| insula      | CW | 12        | 13 | 14      | 15 |
|             | TM | 12        | 12 | 14      | 15 |
| putamen     | CW | 14        | 13 | 15      | 15 |
|             | TM | 12        | 12 | 15      | 14 |
| pallidum    | CW | 15        | 13 | 15      | 15 |
|             | TM | 12        | 12 | 15      | 14 |
| thalamus    | CW | 15        | 13 | 15      | 15 |
|             | TM | 12        | 12 | 14      | 15 |

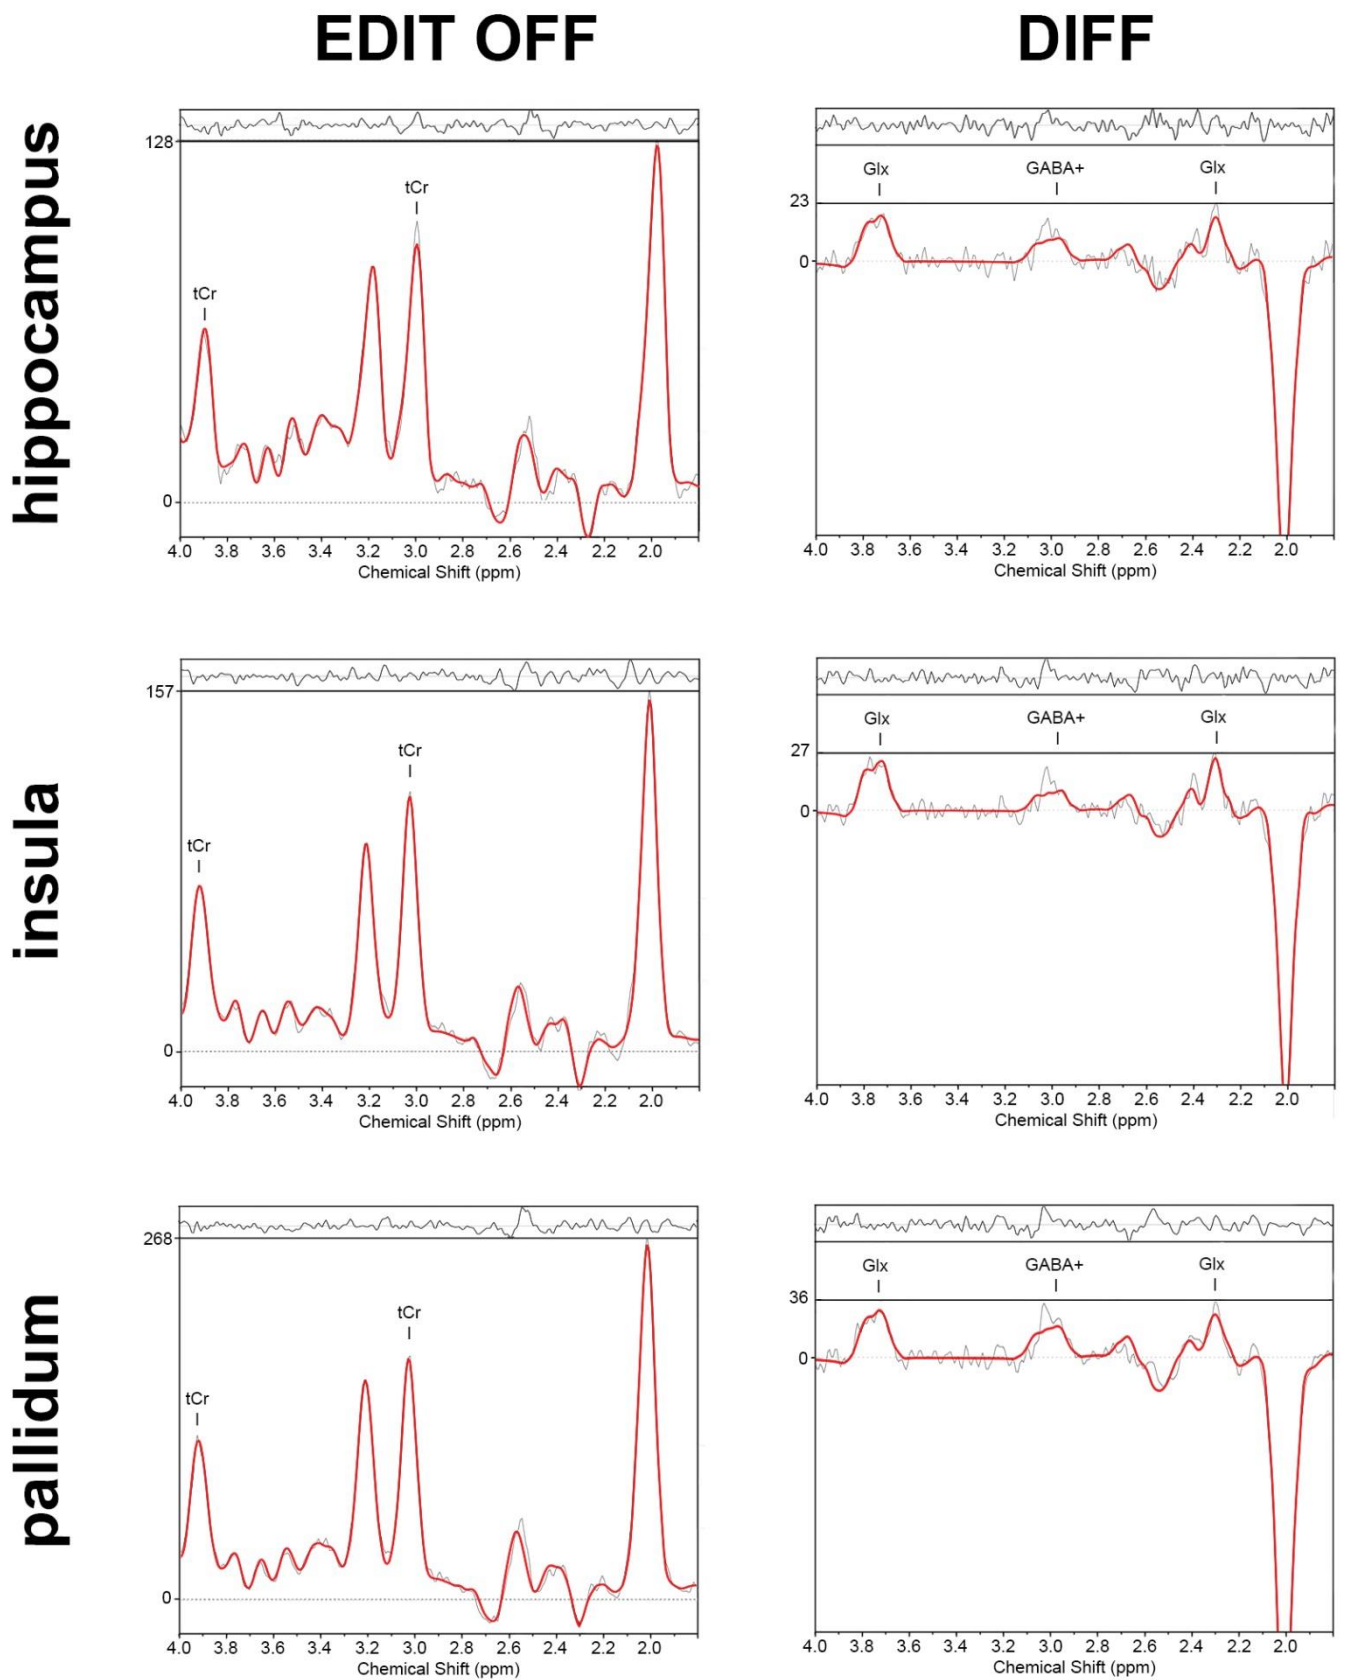

**Supplement figure 1:** LCMoel fits of exemplary non-edited (EDIT OFF) and difference spectra (DIFF) of the hippocampus, insula and pallidum.
